# Supplementary material for: Comparative insights into genome signatures of ferric iron oxide- and anode-stimulated Desulfuromonas spp. strains
Source: BMC Genomics. 2021 Jun 25;22:475. doi: 10.1186/s12864-021-07809-6 (PMC8235581; doi:10.1186/s12864-021-07809-6)
Supplement: Supplementary file 1 — Additional file 1. [file 12864_2021_7809_MOESM1_ESM.xlsx]

## Sheet: Sheet1
Table S1 Isolation sources, isolation approaches and genome features of strains used in this study
Family	Genus	Species	Strain	Taxonomy ID	Type material	Isolation source	Country and location	Isolation approach	Genome assembly accession	Assembly level	Genome size (bp)	No. of multiheme cytochrome c
Desulfuromonaceae	Desulfuromonas	Desulfuromonas sp.	AOP6	1566351	No	subseafloor sediment	Japan:Nankai Trough	acetate and goethite	GCA_009731355	complete	3269909	50
Desulfuromonaceae	Desulfuromonas	Desulfuromonas acetexigens	2873	38815	yes	digester sludge, sewage plant	Germany:Göttingen	acetate and sulfide-containing freshwater mud	GCF_900111775	contig	3683125	56
Desulfuromonaceae	Desulfuromonas	'Desulfuromonas soudanensis'	WTL	1603606	no	deep subsurface anoxic brine	USA:Minnesoda	anodes placed directly in anoxic Soudan Iron Mine borehole brine fluids	GCA_001278055	complete	3958620	38
Desulfuromonaceae	Desulfuromonas	Desulfuromonas sp.	DDH964	1823759	no	terrestrial subsurface brine	USA: Soudan, MN	anodes placed directly in anoxic Soudan Iron Mine borehole brine fluids	GCA_001611275	complete	3924652	31
Desulfuromonaceae	Desulfuromonas	Desulfuromonas sp.	TF	1232410	no	tidal flat	Korea	electrode as the electron acceptor	GCF_000472285	scaffold	4402753	33
Desulfuromonaceae	Desulfuromonas	Desulfuromonas acetoxidans	DSM 684	281689	yes	marine sediment	Antarctica:Antarctic ocean	acetate and elemental sulfur yielded enrichments	GCA_000167355	scaffold	3828328	48
Desulfuromonaceae	Desulfuromonas	Desulfuromonas thiophila	DSM 8987	57664	yes	anoxic mud of a freshwater sulfur spring	New Zealand:Moerewa, Ngawha springs	acetate and elemental sulfur yielded enrichments	GCA_900101955	scaffold	2789967	22
Desulfuromonaceae	Desulfuromusa	Desulfuromusa kysingii	DSM 7343	37625	yes	marine mud	Denmark:Kysing Fjord	succinate and sulfur	GCA_900107645	scaffold	3744894	24
Desulfuromonaceae	Malonomonas	Malonomonas rubra	DSM 5091	1122189	yes	marine mud	Italy:Canale Grande, Venice	mineral medium with malonate	GCA_900142125	contig	3961631	55
Desulfuromonaceae	Pelobacter	Pelobacter carbinolicus	DSM 2380	338963	yes	mud	Italy:Venice, Canale Grande	enrichments with 2,3-butanediol	GCA_000012885	complete	3665893	6
Desulfuromonaceae	Pelobacter	Pelobacter propionicus	DSM 2379	338966	yes	creek mud	Germany:Ottensen near Hannover	enrichments with 2,3-butanediol	GCA_000015045	complete	4241119	11
Desulfuromonaceae	Pelobacter	Pelobacter acetylenicus	DSM 3247	29542	no	marine sediment	Italy:Venice	enrichments with acetylene	GCA_001887715	chromosome	3176363	1
Desulfuromonaceae	Pelobacter	Pelobacter sp.	SFB93	1842532	no	intertidal sediment	USA:San Francisco Bay	enrichments with acetylene	GCA_001887775	complete	3218469	8
Desulfuromonaceae	Pelobacter	Pelobacter acetylenicus	DSM 3246	29542	yes	creek sediment	Germany:Konstanz	enrichments with acetylene	GCA_001888165	complete	3206049	1
Desulfuromonaceae	Pelobacter	Pelobacter seleniigenes	DSM 18267	1122946	yes	freshwater wetland system	USA:New Jersey	enrichments with selenate	GCF_000711225	contig	5088373	36
Geobacteraceae	Geomonas	Geomonas oryzae	S43	2364273	yes	paddy field soil	Japan:Niigata	enrichments with fumarate and acetate	GCF_004117875	contig	4933374	72
Geobacteraceae	Geomonas	Geomonas terrae	Red111	2562681	yes	paddy soil	Japan:Ibaraki	enrichments with fumarate and acetate	GCF_004791675	scaffold	4696900	69
Geobacteraceae	Geomonas	Geomonas ferrireducens	S62	2570227	yes	paddy soil	Japan:Niigata	enrichments with fumarate and acetate	GCF_004917065	contig	4808514	72
Geobacteraceae	Geomonas	Geomonas edaphica	Red53	2570226	yes	paddy soil	Japan:Ibaraki	enrichments with fumarate and acetate	GCF_004917075	contig	4758995	71
Desulfuromonadaceae	Geoalkalibacter	Geoalkalibacter ferrihydriticus	DSM 17813	1121915	yes	sediment of soda lake	Russia: Lake Khadyn, Tuva Region	enrichments with NaAce and FeCl3	GCA_000820505	scaffold	3839692	29
Desulfuromonadaceae	Geoalkalibacter	Geoalkalibacter subterraneus	Red1	483547	yes	oil production brine in deep terrestrial subsurface	USA: Red Wash, Utah	enrichments with NaAce and Fe(III) citrate	GCA_000827125	complete	3717645	38
Desulfuromonadaceae	Geopsychrobacter	Geopsychrobacter electrodiphilus	DSM 16401	1121918	yes	electrode and Fe oxide	USA:Boston Harbor	anode pulled from the marine sediment	GCF_000384395	contig	4241730	31
Desulfuromonadaceae	Geothermobacter	Geothermobacter sp.	EPR-M	1969733	no	hydrothermal vent	Pacific Ocean:East Pacific Rise	unknown	GCA_002093115	contig	3730045	30
Desulfuromonadaceae	Geothermobacter	Geothermobacter sp.	HR-1	654845	no	hydrothermal vent	Pacific Ocean	unknown	GCA_002898515	scaffold	3842851	27
Desulfuromonadaceae	Geothermobacter	Geothermobacter ehrlichii	SS015	213224	yes	hydrothermal vent	USA:Oregon, 300 miles west of Cannon Beach	enrichments with poorly crystalline Fe(III) oxide and DL-malate	GCA_008124615	contig	3235950	26
Geobacteraceae	Geobacter	Geomonas bemidjiensis	Bem	404380	yes	subsurface sediment	USA:Minnesoda	enrichments with poorly crystalline Fe(III) oxide and acetate	GCA_000020725	complete	4615150	61
Geobacteraceae	Geobacter	Geobacter uraniireducens	Rf4	351605	yes	subsurface sediment undergoing uranium bioremediation	missing	direct isolation with clay size fraction minerals and acetate	GCA_000016745	complete	5136364	86
Geobacteraceae	Geobacter	Geobacter daltonii	FRC-32	316067	yes	subsurface sediments contaminated with high levels of uranium(VI) and aromatic hydrocarbons	USA:Tennassee	enrichments with Fe(III)-oxyhydroxide	GCA_000022265	complete	4304501	65
Geobacteraceae	Geobacter	Geobacter metallireducens	GS-15	269799	yes	mud	USA:Potomac river	enrichments with poorly crystalline Fe(III) oxide	GCA_000012925	complete	4011182	59
Geobacteraceae	Geobacter	Geobacter lovleyi	SZ	398767	yes	creek sediment	Korea	enrichments with tetrachloroethene (PCE) and acetate	GCA_000020385	complete	3994874	42
Geobacteraceae	Geobacter	Geobacter pickeringii	G13	345632	yes	subsurface kaolin lenses	USA:Georgia	enrichments with poorly crystalline Fe(III) oxide and acetate	GCA_000817955	complete	3618700	51
Geobacteraceae	Geobacter	Geobacter anodireducens	SD-1	1340425	yes	wastewater of power plant	China	anode biofilm	GCA_001628815	complete	3666014	57
Geobacteraceae	Geobacter	Geobacter sulfurreducens	YM18	35554	no	anaerobic river sediment	Japan:Miyazaki, Yae river	anode enriched	GCA_003574175	complete	3726411	66
Geobacteraceae	Geobacter	Geobacter soli	GSS01	1510391	yes	surface soil sample taken from the humic layer (3.5 m beneath the surface) of an underground ancient forest	China:Guangdong	enrichments with acetate and ferrihydrite	GCA_000816575	scaffold	3657208	58
Geobacteraceae	Geobacter	Geobacter thiogenes	ATCC BAA-34	115783	yes	subsoil along Mill Creek	USA:Michigan	enrichments with Na2SeO3-Na2WO4 and Na2S	GCA_900167465	scaffold	3571247	22
Geobacteraceae	Geobacter	Geobacter argillaceus	ATCC BAA-1139	345631	yes	subsurface kaolin lenses	USA:Georgia	enrichments with poorly crystalline Fe(III) oxide and acetate	GCA_007830735	scaffold	4385310	52
Geobacteraceae	Geobacter	Geomonas bremensis	R1	1304887	no	subsurface sediment	USA:Washington	enrichments with ferrihydrite	GCF_000426865	scaffold	4651027	55
Geobacteraceae	Geobacter	Geobacter sulfurreducens	PCA	243231	yes	ditch surface sediment	USA:Oklahoma	enrichments with soluble ferric PPi and NaAce	GCA_000007985	complete	3814128	72
Geobacteraceae	Geobacter	Geobacter sp.	M18	443143	no	sediment	missing	unknown	GCA_000175115	complete	5277406	76
Geobacteraceae	Geobacter	Geobacter sp.	M21	443144	no	missing	missing	unknown	GCA_000023645	complete	4745806	70
Geobacteraceae	Geobacter	Geobacter sp.	FeAm09	2597769	no	Iron-rich upland soil	Pueto Rico	unknown	GCA_008330225	complete	4099068	64
Geobacteraceae	Geobacter	Geobacter sulfurreducens	KN400	663917	no	Isolated from culture of G. sulfurreducens strain PCA (culture originally isolated from hydrocarbon-contaminated ditch near Norman, OK)	USA:Oklahoma	subculture of PCA	GCA_000210155	complete	3714272	72
Geobacteraceae	Geobacter	Geobacter sp.	DSM 9736	1277350	no	paddy soil	Italy:Vercelli	unknown	GCA_900187405	chromosome	3957783	64
Geobacteraceae	Geobacter	Geobacter sulfurreducens	AM-1	35554	no	wastewater treatment reactor of plastic production plant	Russia: Dzerzinsk	unknown	GCA_000961035	chromosome	4566144	60
Geobacteraceae	Oryzomonas	Oryzomonas sagensis	Red100	2603857	no	paddy soil	Japan:Kanzaki	unknown	GCA_008802355	scaffold	3609742	49
Geobacteraceae	Oryzomonas	Oryzomonas ruber	Red88	2509454	no	river sediment	Japan:Niigata	unknown	GCA_008369015	contig	3798725	53
Geobacteraceae	Oryzomonas	Oryzomonas japonicum	Red96	2603858	no	paddy soil	Japan:Nagaoka	unknown	GCA_008802365	scaffold	3624587	40
Geobacteraceae	Geobacter	Geobacter sp.	OR-1	1266765	no	paddy field	Japan	enrichments with arsenate and acetate	GCA_000813145	contig	4554266	65
Geobacteraceae	Geobacter	Geobacter sp.	DSM 2909	2135459	no	mesophilic digester fed with waste water from starch industry	France	unknown	GCA_003053505	scaffold	4620795	3
Geobacteraceae	Geobacter	Geobacter metallireducens	RCH3	691164	no	sediment	missing	unknown	GCA_000243475	contig	3778796	61
